# Supplementary material
Source: PubMed Central journal article supplement (PMC3634679)
Supplement: supp_tpc.112.108829_tpc108829-Supplemental_Data.pdf [file supp_tpc.112.108829_tpc108829-Supplemental_Data.pdf]

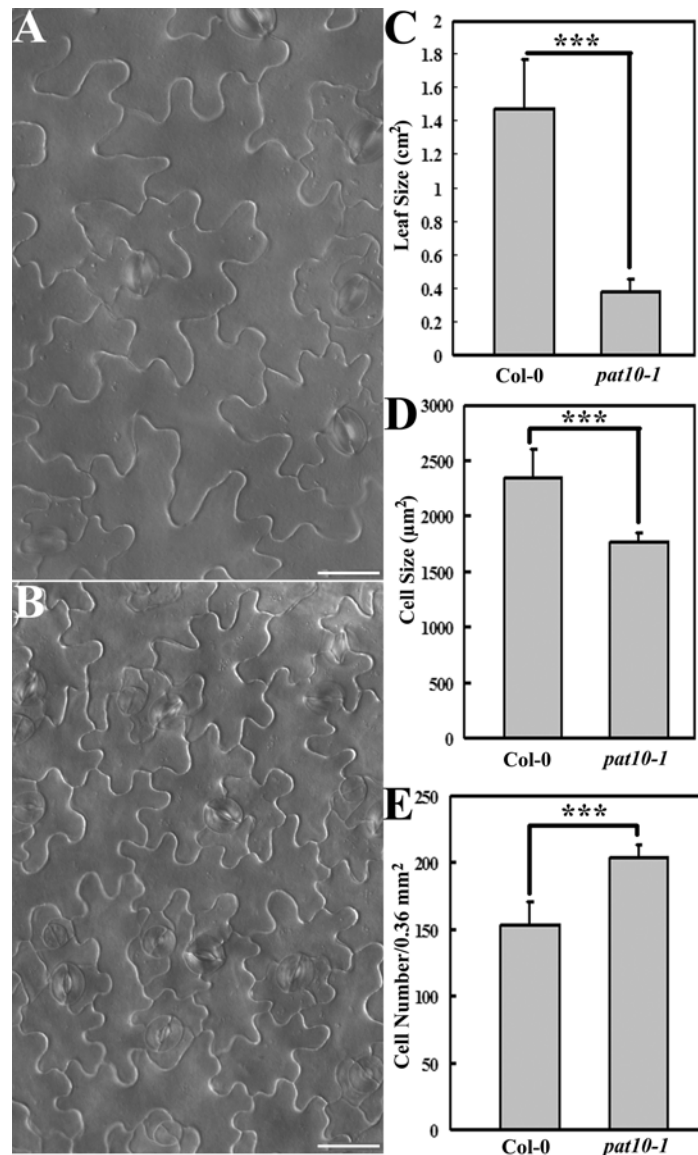

**Supplemental Figure 1.** Cell size and number were both reduced in *pat10*.

(A) and (B) Representative images of epidermal cells from the 4<sup>th</sup> pair of true leaves of wild type (A) or of *pat10* mutants (B) at 20 DAG. Bars = 10 μm.

(C) Leaf size (cm<sup>2</sup>).

(D) Cell size (μm<sup>2</sup>).

(E) Quantification of average cell number/0.36 mm<sup>2</sup>. 20 images from 10 leaves were analyzed using ImageJ.

Results shown in (C), (D) and (E) are given as means ± standard error (SE). Asterisks indicate significant difference (Student's *t*-test, *P*<0.01). Bars = 20 μm.

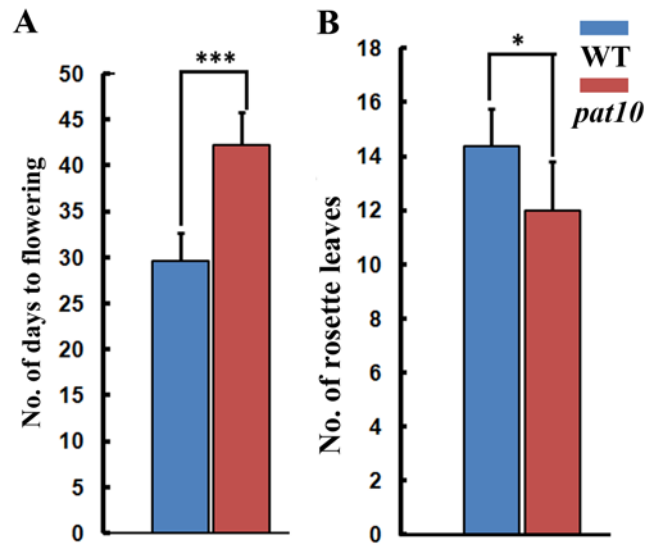

**Supplemental Figure 2.** *PAT10* mutations caused temporally delayed but developmentally early floral transition.

(A) and (B) Number of days to flowering (A) and number of rosette leaves at floral transition (B) in wild type and in *pat10* mutants. Data were collected from 30 long-day-grown plants for each genetic background. Results are given as means  $\pm$  standard deviation (SD). Asterisks indicate statistical significance: one indicates  $P < 0.05$  while three indicate  $P < 0.01$  (Student's *t*-test).

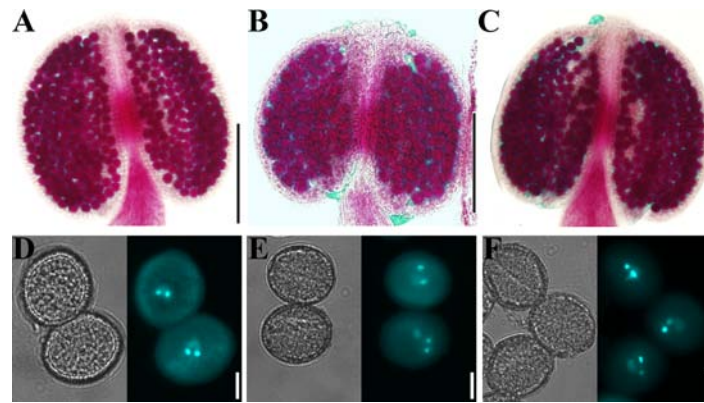

**Supplemental Figure 3.** Pollen viability was not affected by *PAT10* mutations.

(A) to (C) Alexander staining of mature anthers from wild type (A), heterozygous *pat10* mutants (B) and homozygous *pat10* mutants (C). Bars = 200  $\mu$ m.

(D) to (F) Nuclear staining of mature pollen from wild type (D), heterozygous *pat10* mutants (E) and homozygous *pat10* mutants (F). Bright field images and DAPI staining images are placed side by side. Bars of insets = 10  $\mu$ m.

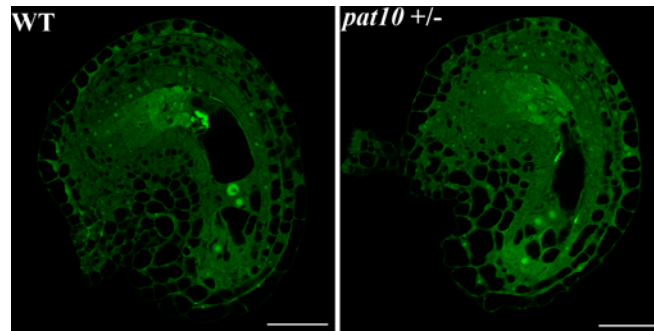

**Supplemental Figure 4.** Embryo sac was normal in ovules from heterozygous *pat10* mutants. Representative ovule from mature pistils of wild type (WT) or heterozygous *pat10* mutants (*pat10 +/-*) are shown (n=20). Bars = 25  $\mu$ m.

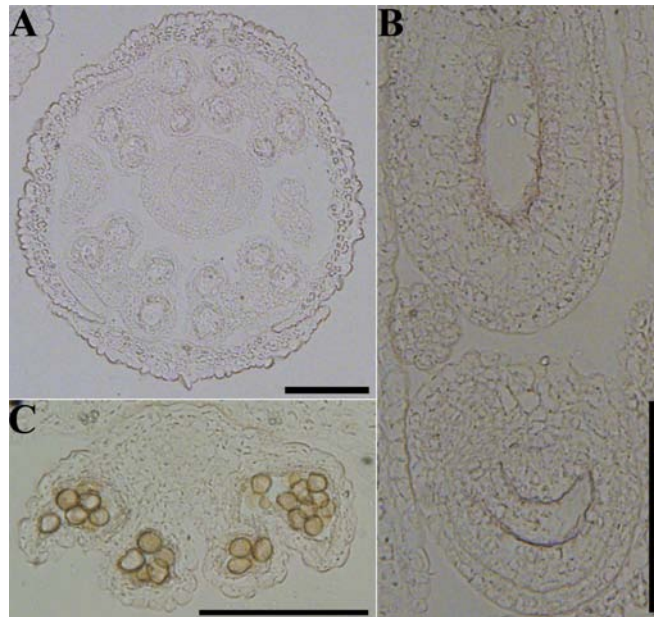

**Supplemental Figure 5.** The probe used in RNA *in situ* hybridization was specific for *PAT10*.

(A) A stage 5-6 *pat10-1* anther labeled by the antisense probe (A).

(B) Longitudinal section of a pistil from *pat10-1* plants labeled by the antisense probe.

(C) A stage 9 *pat10-1* anther labeled by the antisense probe

Bars = 100  $\mu$ m.

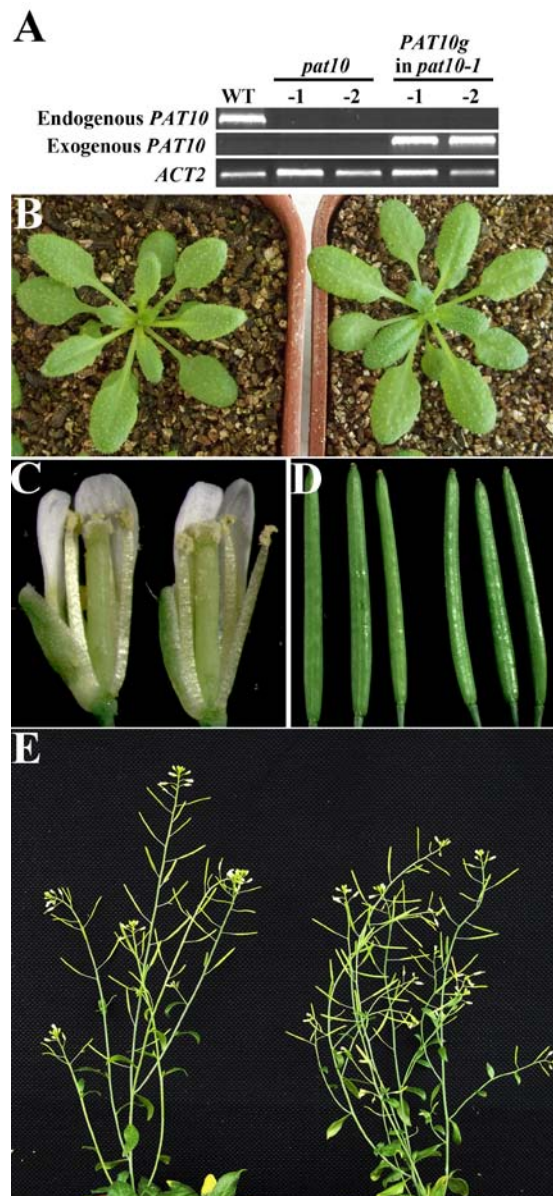

**Supplemental Figure 6.** *PAT10*-GFP complemented *pat10*.

(A) Transcript analysis showing that the complemented lines (two independent transgenic lines expressing *PAT10*-GFP in *pat10-1*) expresses exogenous *PAT10* but not endogenous *PAT10*. *ACT2* was used as the internal control. (B) Representative vegetative growth of wild type (right) and *PAT10*-GFP; *pat10-1* transgenic plants (left). (C) Representative open flowers of wild type (right) and *PAT10*-GFP;*pat10-1* transgenic plants (left). (D) Representative mature siliques of wild type (right) and *PAT10*-GFP;*pat10-1* transgenic plants (left). (E) Representative reproductive growth of wild type (right) and *PAT10*-GFP;*pat10-1* transgenic plants (left).

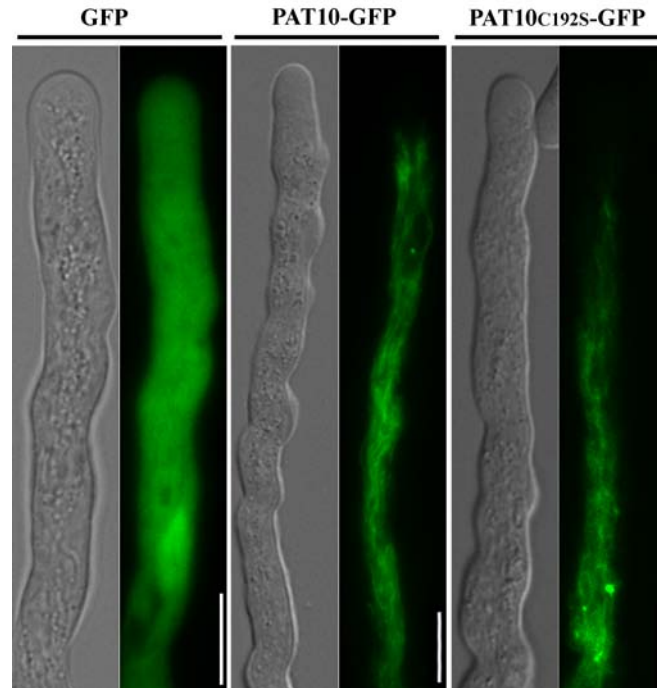

**Supplemental Figure 7.** Subcellular localization of PAT10 and PAT10<sub>C192S</sub> in transgenic Arabidopsis pollen tubes growing *in vitro*.

Representative pollen tubes from stable transgenic plants expressing either soluble GFP, PAT10-GFP or PAT10<sub>C192S</sub>-GFP. Bright field images and fluorescent images are placed side by side. Bars = 10  $\mu$ m.

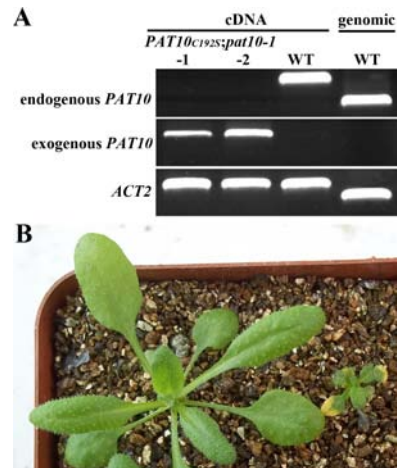

**Supplemental Figure 8.** *PAT10<sub>C192S</sub>-GFP* did not complement *pat10*.

(A) Transcript analysis showing that the *PAT10<sub>C192S</sub>-GFP* transgenic line expresses exogenous *PAT10<sub>C192S</sub>* but not endogenous *PAT10*. *ACT2* was used as the internal control.

(B) Representative vegetative growth of wild type (right) and *PAT10<sub>C192S</sub>-GFP*; *pat10-1* transgenic plants (left).



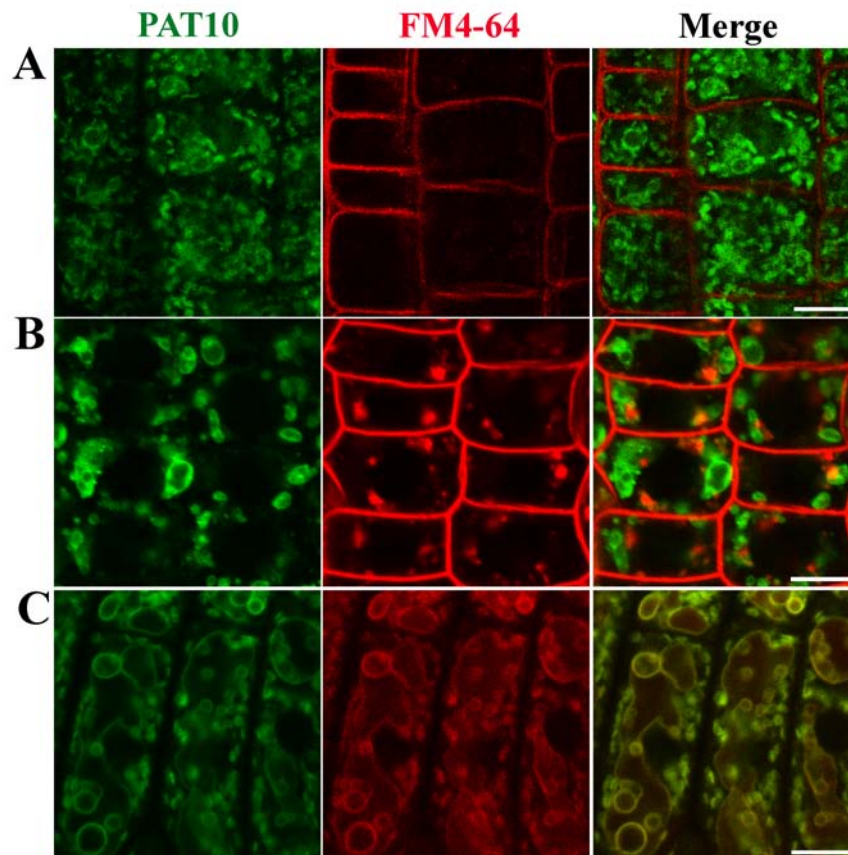

**Supplemental Figure 9.** PAT10 localizes at the tonoplast.

(A) *PAT10*-GFP (green) transgenic roots immediately after 1 min incubation with MS media supplemented with 4 μM FM4-64 (red).

(B) *PAT10*-GFP (green) transgenic roots treated with FM4-64 (red) and BFA. FM4-64 forms BFA-compartments while PAT10 still presents at tonoplast. Roots were treated first with 4 μM FM4-64 for 5 min, then washed and incubated with MS medium supplemented with 50 μM BFA for 50 min and visualized for the formation of BFA compartments.

(C) *PAT10*-GFP (green) transgenic roots 3 hr after FM4-64 (red) treatment when FM4-64 is fully incorporated at tonoplast. Bars = 7.5 μm.

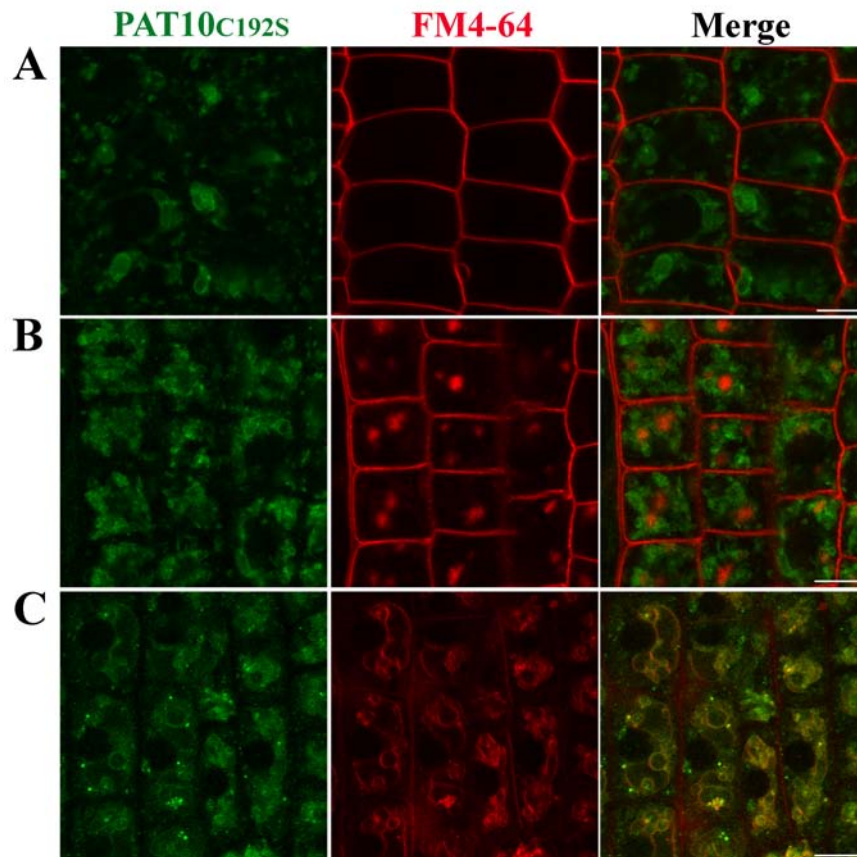

**Supplemental Figure 10.**  $PAT10_{C192S}$  localizes at the tonoplast as well as BFA-sensitive vesicles.

(A)  $PAT10_{C192S}$ -GFP (green) transgenic roots immediately after 1 min incubation with MS media supplemented with 4  $\mu$ M FM4-64 (red).

(B)  $PAT10_{C192S}$ -GFP (green) transgenic roots treated with FM4-64 (red) and BFA. FM4-64 forms BFA-compartments. A substantial fraction of  $PAT10_{C192S}$ -GFP is present not only at tonoplast but also at the aggregates surrounding FM4-64-aggregates. Roots were treated first with 4  $\mu$ M FM4-64 for 5 min, then washed and incubated with MS medium supplemented with 50  $\mu$ M BFA for 50 min and visualized for the formation of BFA compartments.

(C)  $PAT10_{C192S}$ -GFP (green) transgenic roots 3 hr after FM4-64 (red) treatment when FM4-64 is fully incorporated at tonoplast. Beside its tonoplast localization,  $PAT10_{C192S}$ -GFP is present in punctate vesicles not labeled by FM4-64. Bars = 7.5  $\mu$ m.

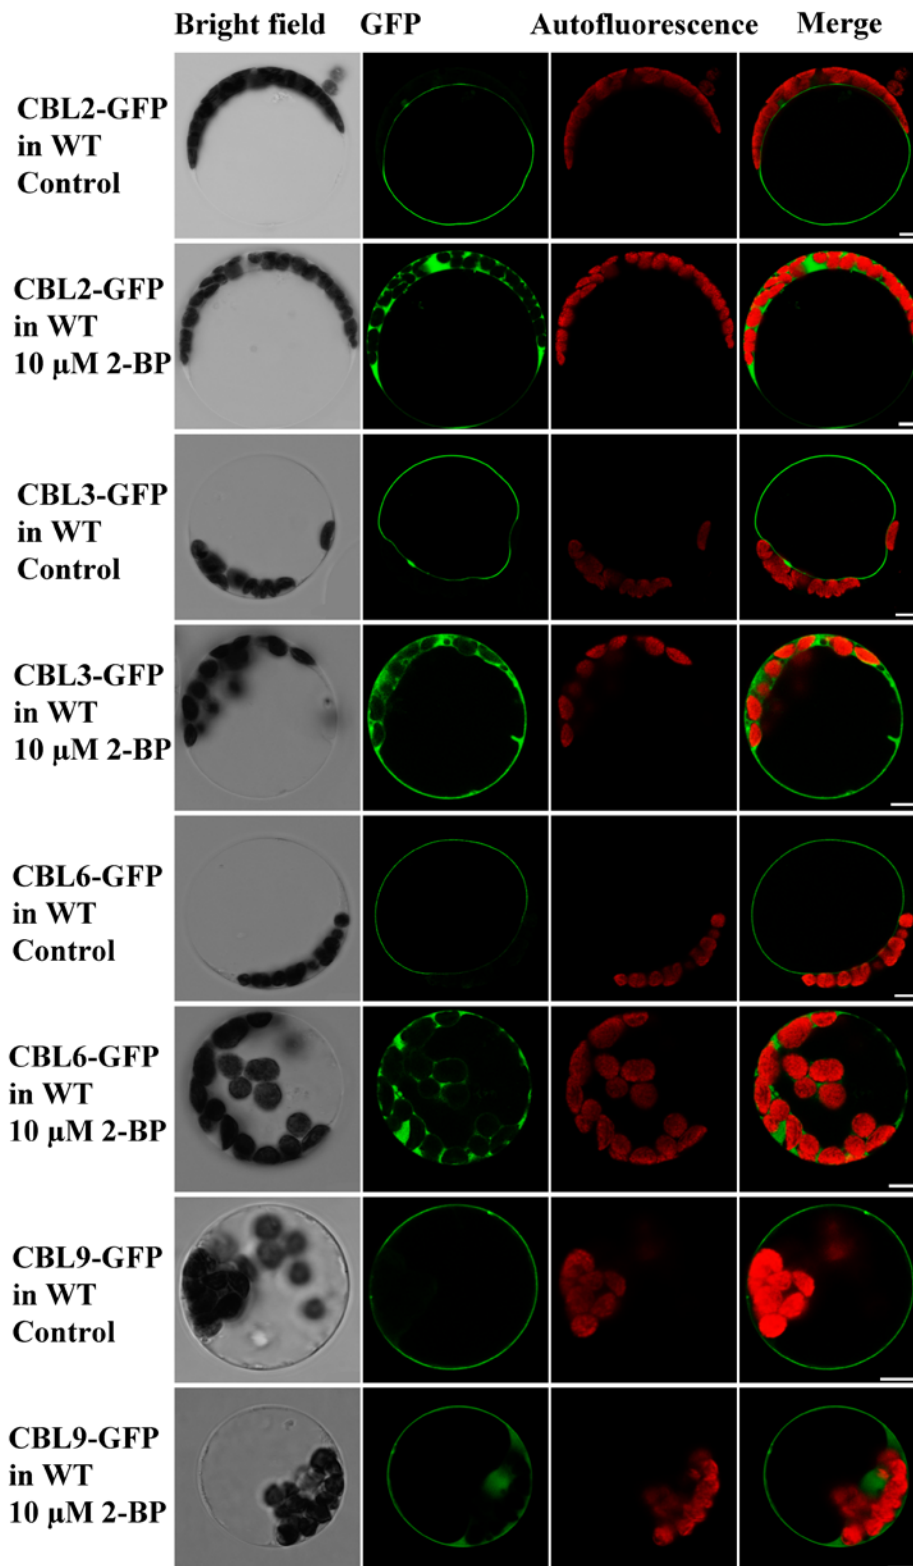

**Supplemental Figure 11.** Treatment with 2-bromopalmitate (2-BP) abolished the membrane association of CBL2, CBL3, CBL6 and CBL9 in wild-type protoplasts. Representative images from three independent experiments are shown. In total, 60-80 protoplasts were visualized for each expression. 2-BP is for 2-bromopalmitate. Bars= 7.5  $\mu$ m.

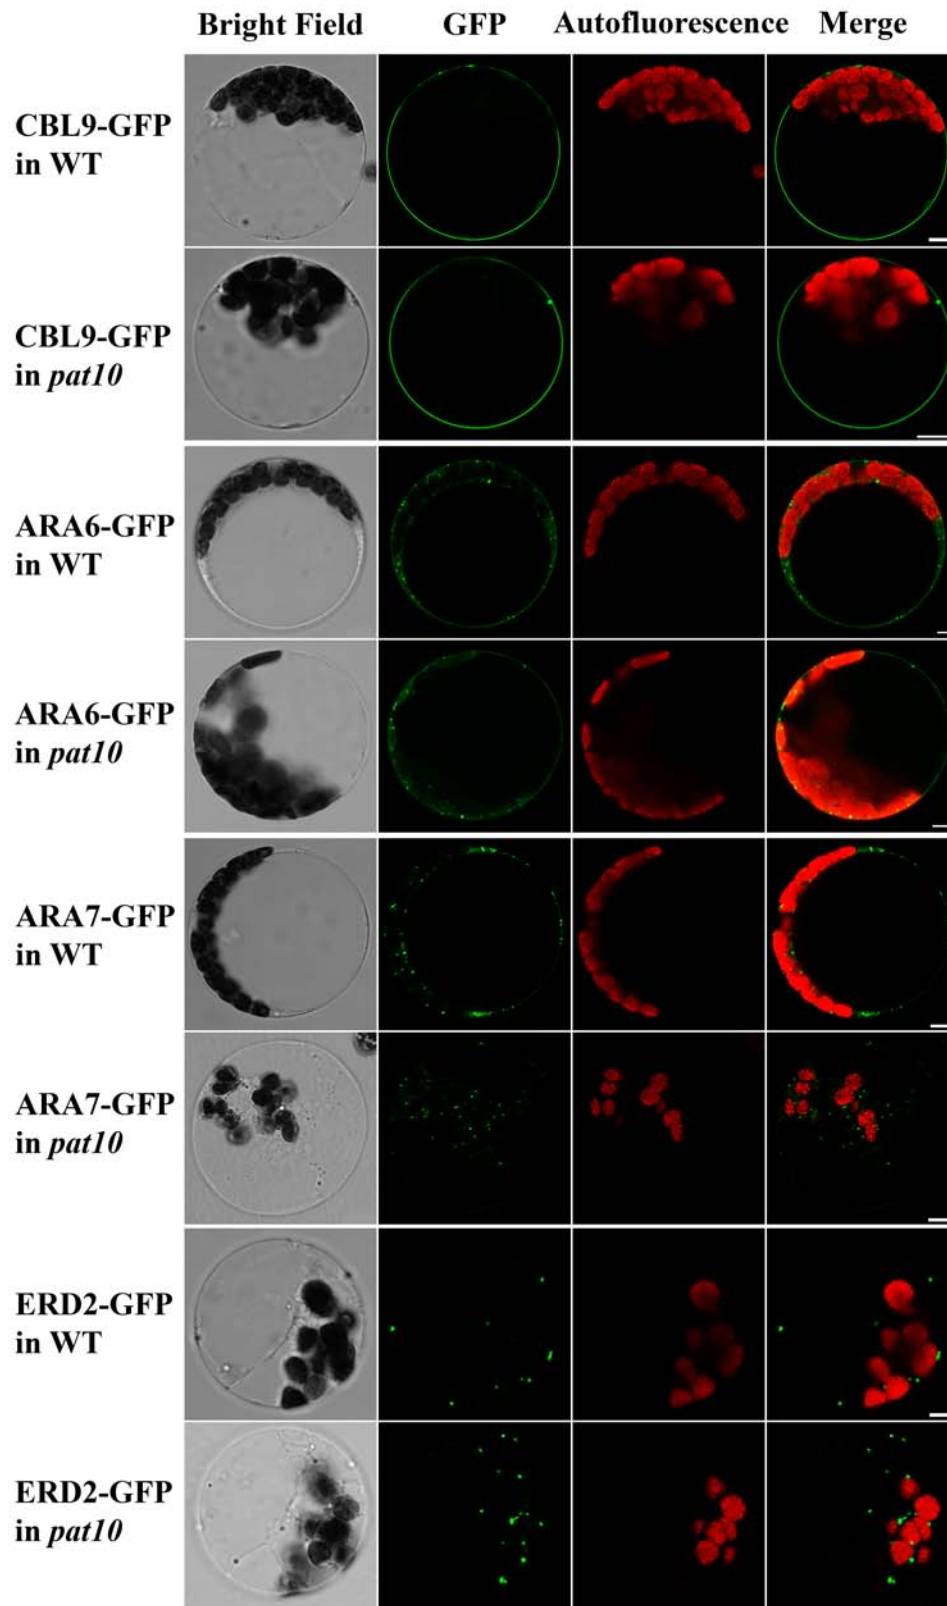

**Supplemental Figure 12.** Membrane association of CBL9, ARA6, ARA7 and ERD2 did not rely on functional *PAT10*. Representative images from three independent experiments are shown. In total, 60-80 protoplasts were visualized for each expression. Bars= 5  $\mu$ m for ARA6 and ERD2. Bars= 7.5  $\mu$ m for ARA7 and CBL9.

**Supplemental Table 1.** Primers used in this study.

| Oligos    | 5'-3' sequences              |
|-----------|------------------------------|
| G1        | ATTTGACATGCGGCTATTGTC        |
| G2        | GAAGATCTGGAGGAGTCGCTC        |
| G3        | ATTTTGCCGATTTTCGGAAC         |
| G4        | GAAGATCTGGAGGAGTCGCTC        |
| G5        | AACGTCCGCAATGTGTTATTAAGTTGTC |
| R1        | ATTTGACATGCGGCTATTGTC        |
| R2        | GAATTTACTATGGTTTTTCTGGCC     |
| R3        | CATATCGATGCAGGTGTAGGG        |
| R4        | TTCTGGTGGTACATCTGTGAAGAG     |
| R5        | TTCTGGTGGTACATCTGTGAAGAG     |
| R6        | GAAGATCTGGAGGAGTCGCTC        |
| R7        | TGAACTTGTGGCCGTTTACGT        |
| RD29A-F   | GTTACTGATCCCACCAAAGAAGA      |
| RD29A-R   | GGAGACTCATCAGTCACTTCCA       |
| RD20-F    | TTAGCTCCGGTCACCAGTCA         |
| RD20-R    | CATGTATGGTTTTGGTAATGTTTCC    |
| ERD10-F   | TCTCTGAACCAGAGTCGTTT         |
| ERD10-R   | CTTCTTCTCACCGTCTTCAC         |
| RAB18-F   | GGCTTGGGAGGAATGCTT           |
| RAB18-R   | TTGATCTTTTGTGTTATTCCCTTCT    |
| GAPDH-F   | TGAAATCAAAAAGCTATCAAGG       |
| GAPDH-R   | CATCATCCTCGGTGTATCCAA        |
| TUBLIN2-F | ATCCGTGAAGAGTACCCAGAT        |
| TUBLIN2-R | AAGAACCATGCACTCATCAGC        |
| PAT10gF   | CACCGTTTATGGGTGGATCTTGTCTTC  |
| PAT10gR   | CGCAGCAGCGACATTTCAAC         |
| PAT10gmF  | GAACATGTATAGGCCAGAAAACC      |

|          |                                  |
|----------|----------------------------------|
| PAT10gmR | CTAACCAAACACTGTGATGATCAAACCTGAAG |
| ProF     | CACCGAGGACGTCTAAGGAAACGTAAA      |
| ProR     | GTTTTGGTTTGACTCTCTCTCTTTC        |
| ProbeF   | CTGGTGGTACATCTGTGAAG             |
| ProbeR   | CGTCTCACAAGTTCATAAGTGC           |
| CBL2-F   | CACCATGTCGCAGTGC GTTGAC          |
| CBL2-R   | GGTATCTTCAACCTGAGAATGG           |
| CBL3-F   | CACCATGTCGCAGTGCATAGACGG         |
| CBL3-R   | GGTATCTTCCACCTGCGAGTG            |
| CBL6-F   | CACCATGATGATGCAATGTTTAGATGG      |
| CBL6-R   | TCCATCCAGCTCACTAGGAG             |
| CBL9-F   | CACCATGGGTTGTTTCCATTCCACG        |
| CBL9-R   | CGTCGCAATCTCGTCCACC              |
| ERD2-F   | CACCATGATATCTTTAGATTTGC          |
| ERD2-R   | AGCCGGAAGCTTAAGTTTGGTG           |
